# Supplementary material
Source: PubMed Central journal article supplement (PMC2638831)
Supplement: ddn402_1.pdf [file ddn402_1.pdf]

**Supplementary Table 1: Overview of samples from cohort 1 used to compose the DNA pools**

| <b>City</b>             | <b># association samples</b> | <b>Bad hearing pool</b> | <b>Average Zscore cases</b> | <b>Good hearing pool</b> | <b>Average Zscore controls</b> | <b>Total</b> | <b>Quantile</b> |
|-------------------------|------------------------------|-------------------------|-----------------------------|--------------------------|--------------------------------|--------------|-----------------|
| <b>Antwerp</b>          | 966                          | 192                     | 1.31                        | 192                      | -0.52                          | 384          | 19.9            |
| <b>Copenhagen</b>       | 396                          | 96                      | 2.05                        | 96                       | -0.66                          | 192          | 24.2            |
| <b>Tubingen</b>         | 387                          | 96                      | 1.78                        | 96                       | -0.48                          | 192          | 24.8            |
| <b>Gent</b>             | 337                          | 96                      | 1.05                        | 96                       | -0.79                          | 192          | 28.5            |
| <b>Padova</b>           | 327                          | 96                      | 1.47                        | 96                       | -0.31                          | 192          | 29.4            |
| <b>Nijmegen</b>         | 273                          | 90                      | 1.53                        | 90                       | -0.51                          | 180          | 33.0            |
| <b>Subtotal Europe</b>  | 2686                         | 666                     | /                           | 666                      | /                              | 1332         | /               |
| <b>Oulu</b>             | 496                          | 96                      | 1.1                         | 96                       | -0.82                          | 192          | 19.4            |
| <b>Tampere</b>          | 252                          | 84                      | 2.04                        | 84                       | -0.56                          | 168          | 33.0            |
| <b>Subtotal Finland</b> | 748                          | 180                     | /                           | 180                      | /                              | 360          | /               |
| <b>Total</b>            | 3434                         | 846                     | /                           | 846                      | /                              | 1692         | /               |

**Supplementary Table 2: Individual-genotyping of European samples of the 252 top-ranked SNPs**

| SNP        | Gene  | Location | Pooled  |         | Associated | HWpval | MAF   | Case,Control<br>Frequencies | Chi<br>square <sup>1</sup> | P value  |
|------------|-------|----------|---------|---------|------------|--------|-------|-----------------------------|----------------------------|----------|
|            |       |          | Ranking | Alleles | Allele     |        |       |                             |                            |          |
| rs6132107  | DTD1  | intron   | 154     | A:G     | A          | 0.3064 | 0.134 | 0.899, 0.835                | 24.207                     | 8.65E-07 |
| rs6136423  | DTD1  | intron   | 474     | G:A     | G          | 0.152  | 0.139 | 0.891, 0.832                | 20.822                     | 5.04E-06 |
| rs9942     |       |          | 247     | C:T     | C          | 1      | 0.142 | 0.886, 0.831                | 17.085                     | 3.57E-05 |
| rs6035106  | DTD1  | intron   | 64      | C:T     | T          | 0.9473 | 0.498 | 0.537, 0.460                | 16.591                     | 4.64E-05 |
| rs7236715  |       |          | 333     | T:C     | T          | 0.2652 | 0.299 | 0.737, 0.667                | 16.12                      | 5.95E-05 |
| rs9403969  |       |          | 282     | T:G     | G          | 0.6884 | 0.258 | 0.292, 0.226                | 15.686                     | 7.48E-05 |
| rs4813338  | DTD1  | intron   | 13      | G:A     | A          | 0.7373 | 0.497 | 0.535, 0.461                | 15.423                     | 8.59E-05 |
| rs11594945 |       |          | 45      | T:C     | T          | 0.7786 | 0.194 | 0.835, 0.777                | 14.402                     | 1.00E-04 |
| rs10193454 | TTC15 | intron   | 458     | G:A     | G          | 0.6564 | 0.143 | 0.883, 0.833                | 14.088                     | 2.00E-04 |
| rs17796442 |       |          | 302     | G:C     | G          | 0.2815 | 0.496 | 0.539, 0.469                | 13.675                     | 2.00E-04 |
| rs9565238  |       |          | 492     | C:G     | G          | 0.852  | 0.313 | 0.347, 0.281                | 14.193                     | 2.00E-04 |
| rs9845917  | DLEC1 | intron   | 139     | T:C     | C          | 0.693  | 0.345 | 0.378, 0.313                | 12.741                     | 4.00E-04 |
| rs562293   |       |          | 595     | C:G     | G          | 0.4343 | 0.249 | 0.278, 0.220                | 12.436                     | 4.00E-04 |
| rs10495177 |       |          | 643     | T:C     | T          | 0.8488 | 0.38  | 0.653, 0.589                | 12.102                     | 5.00E-04 |
| rs11928865 | GRM7  | intron   | 3       | T:A     | T          | 0.8713 | 0.259 | 0.769, 0.714                | 11.244                     | 8.00E-04 |
| rs2280307  | RHOH  | intron   | 79      | G:A     | G          | 0.0112 | 0.325 | 0.704, 0.646                | 10.837                     | 0.001    |
| rs3934723  |       |          | 17      | C:G     | C          | 1      | 0.388 | 0.642, 0.583                | 10.267                     | 0.0014   |
| rs2295956  |       |          | 188     | T:G     | T          | 0.0508 | 0.242 | 0.784, 0.732                | 9.951                      | 0.0016   |
| rs10229361 |       |          | 32      | C:A     | C          | 0.9523 | 0.174 | 0.849, 0.805                | 9.439                      | 0.0021   |
| rs11985327 |       |          | 186     | C:T     | T          | 0.2337 | 0.344 | 0.372, 0.318                | 9.257                      | 0.0023   |
| rs10134299 | RIN3  | intron   | 418     | T:G     | T          | 0.5452 | 0.123 | 0.896, 0.858                | 9.254                      | 0.0023   |
| rs2104237  | RIN3  | intron   | 31      | A:G     | A          | 0.5795 | 0.124 | 0.896, 0.858                | 9.285                      | 0.0023   |
| rs7163460  | IQCH  | intron   | 175     | A:G     | A          | 0.7433 | 0.226 | 0.798, 0.750                | 9.192                      | 0.0024   |
| rs13313527 |       |          | 293     | G:A     | G          | 0.6205 | 0.385 | 0.643, 0.587                | 9.135                      | 0.0025   |
| rs9632550  |       |          | 100     | G:A     | G          | 0.6702 | 0.125 | 0.894, 0.857                | 8.916                      | 0.0028   |
| rs7048135  |       |          | 460     | T:G     | T          | 0.6749 | 0.157 | 0.864, 0.823                | 8.846                      | 0.0029   |
| rs2056116  |       |          | 26      | A:G     | A          | 0.7882 | 0.383 | 0.644, 0.591                | 8.381                      | 0.0038   |
| rs6426044  |       |          | 127     | G:A     | G          | 0.1621 | 0.226 | 0.797, 0.752                | 8.376                      | 0.0038   |
| rs17454023 |       |          | 449     | T:C     | T          | 0.8409 | 0.456 | 0.572, 0.518                | 8.308                      | 0.0039   |
| rs4728377  |       |          | 568     | T:C     | T          | 1      | 0.174 | 0.847, 0.805                | 8.311                      | 0.0039   |

|            |              |                                    |     |     |   |        |       |              |       |        |
|------------|--------------|------------------------------------|-----|-----|---|--------|-------|--------------|-------|--------|
| rs11609020 |              |                                    | 103 | A:G | A | 0.2605 | 0.128 | 0.890, 0.854 | 8.268 | 0.004  |
| rs4836672  |              |                                    | 325 | G:A | A | 0.3949 | 0.041 | 0.052, 0.030 | 8.306 | 0.004  |
| rs9514229  |              |                                    | 190 | G:C | G | 0.9743 | 0.13  | 0.889, 0.852 | 8.249 | 0.0041 |
| rs11654023 |              |                                    | 288 | A:C | A | 0.2739 | 0.157 | 0.863, 0.824 | 8.204 | 0.0042 |
| rs3813948  | C4BPB        | intron                             | 251 | A:G | A | 0.0892 | 0.073 | 0.941, 0.913 | 8.127 | 0.0044 |
| rs6440052  |              |                                    | 218 | T:C | T | 0.1576 | 0.263 | 0.761, 0.714 | 7.731 | 0.0054 |
| rs10132168 | TC2N         | intron                             | 239 | G:T | G | 0.6611 | 0.029 | 0.980, 0.962 | 7.607 | 0.0058 |
| rs2688388  | CSMD1        | intron                             | 131 | T:C | T | 0.4341 | 0.259 | 0.764, 0.719 | 7.493 | 0.0062 |
| rs1016730  | ASTN2        | intron                             | 159 | T:A | T | 1      | 0.424 | 0.602, 0.550 | 7.39  | 0.0066 |
| rs16899799 | FGFR1OP      | intron                             | 68  | A:G | A | 1      | 0.018 | 0.988, 0.975 | 7.27  | 0.007  |
| rs3794261  | METAP2,USP44 | coding-synonymous,intron,reference | 36  | G:T | G | 0.3361 | 0.095 | 0.920, 0.890 | 7.236 | 0.0071 |
| rs6768608  | KCNMB2       | intron                             | 428 | G:C | G | 0.3462 | 0.387 | 0.638, 0.589 | 7.199 | 0.0073 |
| rs4433032  | WIPI2        | intron                             | 312 | C:G | C | 0.531  | 0.067 | 0.946, 0.921 | 7.098 | 0.0077 |
| rs10157110 | KIAA126      | intron                             | 388 | T:G | T | 0.0727 | 0.224 | 0.797, 0.756 | 7.052 | 0.0079 |
| rs16952027 |              |                                    | 493 | T:A | T | 0.3957 | 0.092 | 0.923, 0.894 | 6.942 | 0.0084 |
| rs9602899  |              |                                    | 640 | C:G | G | 0.9866 | 0.358 | 0.383, 0.335 | 6.899 | 0.0086 |
| rs9972796  |              |                                    | 421 | A:C | C | 0.4406 | 0.326 | 0.349, 0.303 | 6.863 | 0.0088 |
| rs10187051 | LOC388963    | intron                             | 389 | T:C | T | 0.8408 | 0.137 | 0.880, 0.846 | 6.684 | 0.0097 |
| rs10508823 |              |                                    | 635 | G:A | G | 0.2904 | 0.162 | 0.856, 0.820 | 6.658 | 0.0099 |
| rs6023649  |              |                                    | 616 | G:A | G | 0.1398 | 0.262 | 0.760, 0.717 | 6.654 | 0.0099 |
| rs6544006  |              |                                    | 519 | C:T | C | 0.4851 | 0.083 | 0.931, 0.904 | 6.591 | 0.0102 |
| rs2505700  |              |                                    | 516 | T:C | T | 0.6084 | 0.121 | 0.895, 0.863 | 6.536 | 0.0106 |
| rs11138851 |              |                                    | 263 | A:G | A | 0.3585 | 0.149 | 0.868, 0.834 | 6.423 | 0.0113 |
| rs1425073  |              |                                    | 385 | C:T | C | 0.7672 | 0.434 | 0.590, 0.543 | 6.378 | 0.0116 |
| rs11712177 |              |                                    | 404 | C:G | C | 0.9316 | 0.318 | 0.704, 0.660 | 6.375 | 0.0116 |
| rs4568885  |              |                                    | 609 | A:G | A | 0.1247 | 0.04  | 0.970, 0.951 | 6.136 | 0.0132 |
| rs16954288 |              |                                    | 116 | T:A | T | 0.4688 | 0.1   | 0.914, 0.886 | 6.115 | 0.0134 |
| rs11104675 |              |                                    | 406 | G:A | G | 0.5528 | 0.198 | 0.821, 0.784 | 5.939 | 0.0148 |
| rs1242535  |              |                                    | 187 | C:T | C | 0.0468 | 0.077 | 0.935, 0.910 | 5.898 | 0.0152 |
| rs1563696  |              |                                    | 221 | G:A | G | 0.3057 | 0.347 | 0.675, 0.632 | 5.845 | 0.0156 |
| rs2515800  |              |                                    | 437 | T:C | T | 0.6516 | 0.164 | 0.853, 0.819 | 5.827 | 0.0158 |
| rs2733027  |              |                                    | 248 | C:T | C | 0.2646 | 0.46  | 0.563, 0.518 | 5.782 | 0.0162 |
| rs9317304  |              |                                    | 442 | G:A | G | 0.5332 | 0.208 | 0.810, 0.774 | 5.608 | 0.0179 |

|            |          |        |     |     |   |        |       |              |       |        |
|------------|----------|--------|-----|-----|---|--------|-------|--------------|-------|--------|
| rs10945909 |          |        | 422 | C:T | T | 0.348  | 0.472 | 0.494, 0.450 | 5.594 | 0.018  |
| rs17652307 | FLJ3281  | intron | 382 | A:G | A | 0.7625 | 0.047 | 0.962, 0.943 | 5.561 | 0.0184 |
| rs2983088  |          |        | 435 | A:G | A | 1      | 0.024 | 0.983, 0.970 | 5.439 | 0.0197 |
| rs888438   | RYR2     | intron | 151 | G:T | G | 0.2617 | 0.185 | 0.832, 0.799 | 5.304 | 0.0213 |
| rs17123109 | C12orf54 | intron | 544 | A:G | A | 0.759  | 0.055 | 0.955, 0.935 | 5.269 | 0.0217 |
| rs10996614 |          |        | 157 | T:C | T | 0.7384 | 0.047 | 0.962, 0.944 | 5.12  | 0.0237 |
| rs7920090  |          |        | 208 | A:T | A | 0.9702 | 0.175 | 0.842, 0.809 | 5.067 | 0.0244 |
| rs6890492  |          |        | 1   | A:G | A | 0.704  | 0.108 | 0.905, 0.879 | 5.011 | 0.0252 |
| rs2174297  |          |        | 2   | C:T | C | 0.2584 | 0.345 | 0.676, 0.636 | 4.968 | 0.0258 |
| rs8079727  | NLRP1    | intron | 545 | A:C | A | 0.1314 | 0.247 | 0.771, 0.735 | 4.955 | 0.026  |
| rs16869623 |          |        | 5   | T:G | T | 0.3141 | 0.071 | 0.940, 0.918 | 4.922 | 0.0265 |
| rs17716738 |          |        | 237 | T:C | T | 0.5696 | 0.123 | 0.891, 0.864 | 4.9   | 0.0269 |
| rs489927   |          |        | 210 | C:T | C | 0.3688 | 0.024 | 0.983, 0.970 | 4.877 | 0.0272 |
| rs7305501  |          |        | 439 | A:G | A | 0.3639 | 0.24  | 0.778, 0.742 | 4.829 | 0.028  |
| rs6444452  |          |        | 409 | C:T | C | 0.5983 | 0.072 | 0.939, 0.917 | 4.788 | 0.0287 |
| rs10112140 |          |        | 205 | T:C | C | 0.0846 | 0.477 | 0.498, 0.457 | 4.775 | 0.0289 |
| rs11853442 |          |        | 10  | G:A | G | 0.8181 | 0.452 | 0.569, 0.528 | 4.665 | 0.0308 |
| rs4584805  |          |        | 482 | G:A | G | 0.1504 | 0.228 | 0.790, 0.755 | 4.643 | 0.0312 |
| rs9992098  |          |        | 123 | T:C | T | 0.8206 | 0.06  | 0.949, 0.930 | 4.558 | 0.0328 |
| rs9869419  |          |        | 51  | A:G | A | 1      | 0.066 | 0.944, 0.924 | 4.525 | 0.0334 |
| rs8181973  | FAM12A   | intron | 104 | A:G | A | 0.8067 | 0.115 | 0.898, 0.873 | 4.405 | 0.0358 |
| rs11784580 |          |        | 25  | C:G | C | 0.1688 | 0.334 | 0.685, 0.648 | 4.366 | 0.0367 |
| rs9813040  |          |        | 526 | A:G | A | 0.5555 | 0.111 | 0.901, 0.876 | 4.347 | 0.0371 |
| rs10483002 |          |        | 252 | T:G | T | 1      | 0.036 | 0.971, 0.957 | 4.115 | 0.0425 |
| rs8009668  |          |        | 542 | G:A | G | 0.4844 | 0.222 | 0.795, 0.763 | 4.074 | 0.0435 |
| rs7895344  |          |        | 108 | T:C | T | 0.3163 | 0.276 | 0.741, 0.707 | 4.064 | 0.0438 |
| rs17127945 | ATXN3    | intron | 129 | A:G | A | 0.9925 | 0.178 | 0.836, 0.807 | 4.001 | 0.0455 |
| rs1466183  |          |        | 378 | T:G | T | 1      | 0.048 | 0.960, 0.944 | 3.974 | 0.0462 |
| rs17284739 | PFKP     | intron | 120 | A:G | A | 1      | 0.058 | 0.951, 0.933 | 3.962 | 0.0465 |
| rs17558231 |          |        | 24  | T:G | T | 0.8931 | 0.059 | 0.950, 0.932 | 3.937 | 0.0472 |
| rs10867852 |          |        | 551 | C:T | C | 0.574  | 0.071 | 0.939, 0.920 | 3.727 | 0.0535 |
| rs10947914 |          |        | 80  | T:A | A | 0.0171 | 0.239 | 0.255, 0.224 | 3.697 | 0.0545 |
| rs2952322  |          |        | 84  | A:T | A | 1      | 0.217 | 0.798, 0.768 | 3.68  | 0.0551 |

|            |         |        |     |     |   |          |       |              |       |        |
|------------|---------|--------|-----|-----|---|----------|-------|--------------|-------|--------|
| rs999745   |         |        | 606 | C:T | C | 0.4558   | 0.402 | 0.616, 0.580 | 3.673 | 0.0553 |
| rs553648   | ZFYVE9  | intron | 623 | G:A | G | 1        | 0.028 | 0.978, 0.966 | 3.658 | 0.0558 |
| rs4319945  | GRB14   | intron | 44  | T:C | T | 0.5735   | 0.284 | 0.732, 0.700 | 3.589 | 0.0582 |
| rs2584991  |         |        | 91  | G:A | G | 0.2681   | 0.188 | 0.827, 0.799 | 3.498 | 0.0614 |
| rs10514777 | AFF3    | intron | 194 | A:G | A | 0.8627   | 0.197 | 0.818, 0.790 | 3.474 | 0.0623 |
| rs7699643  |         |        | 600 | T:C | T | 0.6529   | 0.133 | 0.879, 0.856 | 3.451 | 0.0632 |
| rs17573253 | CCT4    | intron | 37  | A:G | G | 0.4717   | 0.241 | 0.256, 0.226 | 3.436 | 0.0638 |
| rs17727615 | PDE4D   | intron | 234 | C:G | C | 0.8093   | 0.077 | 0.933, 0.914 | 3.353 | 0.0671 |
| rs982932   | RORA    | intron | 351 | T:C | C | 0.5482   | 0.357 | 0.374, 0.341 | 3.318 | 0.0685 |
| rs7187365  |         |        | 292 | C:T | C | 0.9225   | 0.165 | 0.848, 0.822 | 3.313 | 0.0687 |
| rs4734143  |         |        | 166 | C:T | C | 0.8215   | 0.299 | 0.717, 0.685 | 3.302 | 0.0692 |
| rs13064847 | TP63    | intron | 124 | C:G | C | 0.6621   | 0.058 | 0.950, 0.934 | 3.281 | 0.0701 |
| rs11020938 | GRM5    | intron | 89  | T:C | T | 0.1806   | 0.019 | 0.985, 0.976 | 3.211 | 0.0732 |
| rs276672   |         |        | 115 | A:G | A | 0.3219   | 0.196 | 0.818, 0.791 | 3.203 | 0.0735 |
| rs2871238  |         |        | 256 | A:T | T | 0.9052   | 0.47  | 0.487, 0.453 | 3.173 | 0.0749 |
| rs6836600  |         |        | 384 | C:T | C | 0.801    | 0.031 | 0.975, 0.963 | 3.168 | 0.0751 |
| rs16852308 |         |        | 489 | C:T | C | 0.0544   | 0.069 | 0.940, 0.923 | 3.162 | 0.0754 |
| rs12328731 |         |        | 39  | T:G | T | 1.55E-16 | 0.208 | 0.806, 0.778 | 3.154 | 0.0757 |
| rs9299249  | ASTN2   | intron | 355 | A:G | G | 0.9775   | 0.491 | 0.508, 0.474 | 3.132 | 0.0768 |
| rs256177   |         |        | 359 | C:G | C | 0.5354   | 0.157 | 0.855, 0.831 | 3.123 | 0.0772 |
| rs6444338  |         |        | 203 | G:A | G | 1        | 0.035 | 0.971, 0.959 | 3.111 | 0.0778 |
| rs2169450  | CDH13   | intron | 169 | G:C | G | 0.4105   | 0.118 | 0.893, 0.872 | 2.973 | 0.0847 |
| rs6855230  |         |        | 570 | A:G | A | 0.2204   | 0.18  | 0.833, 0.808 | 2.948 | 0.086  |
| rs1388611  | PTPRG   | intron | 559 | A:G | A | 0.7843   | 0.222 | 0.791, 0.765 | 2.842 | 0.0918 |
| rs2486027  |         |        | 33  | C:A | C | 1        | 0.061 | 0.946, 0.931 | 2.842 | 0.0918 |
| rs8118269  |         |        | 109 | A:G | A | 0.5042   | 0.031 | 0.975, 0.964 | 2.832 | 0.0924 |
| rs17214392 | C4orf26 | intron | 176 | A:C | A | 0.309    | 0.228 | 0.786, 0.759 | 2.822 | 0.093  |
| rs9838048  |         |        | 22  | C:T | C | 0.975    | 0.106 | 0.904, 0.884 | 2.802 | 0.0942 |
| rs2651558  |         |        | 35  | A:G | A | 0.0827   | 0.14  | 0.871, 0.849 | 2.755 | 0.097  |
| rs17333110 |         |        | 541 | A:G | A | 1        | 0.049 | 0.958, 0.945 | 2.729 | 0.0985 |
| rs490144   |         |        | 128 | T:G | T | 0.613    | 0.045 | 0.962, 0.949 | 2.728 | 0.0986 |
| rs17015175 | ROBO2   | intron | 214 | G:A | G | 0.0477   | 0.104 | 0.905, 0.886 | 2.725 | 0.0988 |
| rs4905587  |         |        | 202 | G:T | G | 1        | 0.11  | 0.900, 0.880 | 2.637 | 0.1044 |

|            |         |          |     |     |   |          |       |              |       |        |
|------------|---------|----------|-----|-----|---|----------|-------|--------------|-------|--------|
| rs833621   |         |          | 373 | A:G | G | 0.2258   | 0.368 | 0.382, 0.353 | 2.538 | 0.1111 |
| rs4475756  | KIF1B   | intron   | 556 | A:G | A | 0.1829   | 0.341 | 0.673, 0.645 | 2.429 | 0.1191 |
| rs17023472 | RBMS3   | intron   | 257 | C:G | C | 1        | 0.018 | 0.986, 0.978 | 2.421 | 0.1197 |
| rs17120651 |         |          | 309 | A:G | A | 0.3733   | 0.033 | 0.972, 0.962 | 2.38  | 0.1229 |
| rs4072273  |         |          | 142 | T:G | T | 0.3998   | 0.046 | 0.960, 0.948 | 2.378 | 0.123  |
| rs8103388  |         |          | 555 | A:G | A | 0.7589   | 0.172 | 0.839, 0.817 | 2.343 | 0.1259 |
| rs17237865 |         |          | 411 | A:G | A | 0.4192   | 0.144 | 0.866, 0.846 | 2.272 | 0.1317 |
| rs8186775  |         |          | 614 | G:T | G | 0.098    | 0.044 | 0.962, 0.950 | 2.226 | 0.1357 |
| rs2584622  | SMARCD2 | mrna-utr | 72  | T:C | T | 0.7014   | 0.07  | 0.938, 0.923 | 2.153 | 0.1423 |
| rs2301702  | AKAP1   | intron   | 585 | C:T | C | 0.5935   | 0.136 | 0.873, 0.854 | 2.149 | 0.1427 |
| rs7119608  |         |          | 63  | A:C | A | 1.05E-13 | 0.079 | 0.929, 0.914 | 2.149 | 0.1427 |
| rs8179740  | TBC1D8  | intron   | 66  | C:T | C | 0.2118   | 0.134 | 0.875, 0.857 | 2.037 | 0.1535 |
| rs4356573  |         |          | 538 | A:C | A | 1        | 0.304 | 0.708, 0.683 | 2.01  | 0.1562 |
| rs1269077  |         |          | 150 | T:G | T | 0.8972   | 0.215 | 0.796, 0.775 | 1.914 | 0.1665 |
| rs806274   |         |          | 605 | C:A | C | 0.307    | 0.031 | 0.973, 0.964 | 1.887 | 0.1695 |
| rs799718   |         |          | 130 | G:C | G | 0.9015   | 0.08  | 0.927, 0.913 | 1.864 | 0.1722 |
| rs11048790 |         |          | 167 | G:C | G | 0.6148   | 0.092 | 0.915, 0.901 | 1.787 | 0.1814 |
| rs7234814  | FHOD3   | intron   | 344 | T:C | T | 0.6583   | 0.038 | 0.967, 0.957 | 1.745 | 0.1866 |
| rs605909   |         |          | 52  | G:A | G | 0.228    | 0.089 | 0.918, 0.904 | 1.725 | 0.189  |
| rs11215936 |         |          | 177 | G:A | G | 0.8193   | 0.054 | 0.952, 0.941 | 1.653 | 0.1985 |
| rs17058481 |         |          | 168 | C:G | C | 1        | 0.065 | 0.941, 0.929 | 1.628 | 0.2019 |
| rs6090159  | DIDO1   | intron   | 138 | C:G | C | 0.0704   | 0.202 | 0.808, 0.789 | 1.622 | 0.2028 |
| rs12651043 |         |          | 488 | C:T | C | 0.9329   | 0.147 | 0.861, 0.844 | 1.603 | 0.2055 |
| rs2171504  | SPATA12 | intron   | 122 | A:C | A | 0.6191   | 0.041 | 0.964, 0.954 | 1.579 | 0.2089 |
| rs4438459  |         |          | 98  | C:T | C | 0.7214   | 0.363 | 0.648, 0.625 | 1.575 | 0.2094 |
| rs6507256  |         |          | 75  | C:T | C | 0.4746   | 0.113 | 0.894, 0.879 | 1.57  | 0.2102 |
| rs16956753 |         |          | 496 | T:C | T | 1        | 0.019 | 0.984, 0.977 | 1.553 | 0.2127 |
| rs815471   | ERC2    | intron   | 327 | G:A | A | 0.4109   | 0.116 | 0.124, 0.109 | 1.536 | 0.2152 |
| rs6751498  |         |          | 30  | A:C | A | 0.1204   | 0.056 | 0.950, 0.939 | 1.526 | 0.2167 |
| rs17369163 |         |          | 141 | C:G | C | 0.0544   | 0.13  | 0.878, 0.863 | 1.487 | 0.2226 |
| rs4737369  |         |          | 74  | C:T | C | 1        | 0.336 | 0.675, 0.653 | 1.485 | 0.223  |
| rs10513557 | PPM1L   | intron   | 14  | C:T | C | 0.4762   | 0.042 | 0.962, 0.953 | 1.418 | 0.2337 |
| rs2210723  |         |          | 147 | A:G | A | 0.6223   | 0.08  | 0.926, 0.914 | 1.398 | 0.2371 |

|            |         |        |     |     |   |        |       |              |       |        |
|------------|---------|--------|-----|-----|---|--------|-------|--------------|-------|--------|
| rs7131977  | ALDH1L2 | intron | 527 | A:G | A | 0.9509 | 0.034 | 0.970, 0.962 | 1.379 | 0.2402 |
| rs9657021  | CYP11B1 | intron | 86  | T:C | T | 0.7278 | 0.027 | 0.977, 0.970 | 1.324 | 0.2499 |
| rs4737395  |         |        | 484 | A:G | A | 0.1848 | 0.115 | 0.892, 0.879 | 1.299 | 0.2544 |
| rs6557093  | PLEKHG1 | intron | 480 | C:A | C | 0.8746 | 0.148 | 0.859, 0.845 | 1.215 | 0.2703 |
| rs2628235  |         |        | 515 | C:G | C | 0.9705 | 0.044 | 0.960, 0.952 | 1.211 | 0.2712 |
| rs2077354  | HIVEP3  | intron | 261 | T:C | T | 1      | 0.002 | 0.999, 0.997 | 1.185 | 0.2764 |
| rs16904196 |         |        | 249 | A:C | A | 1      | 0.025 | 0.978, 0.972 | 1.123 | 0.2893 |
| rs1903977  | PRKG1   | intron | 102 | A:T | A | 0.5449 | 0.396 | 0.614, 0.594 | 1.116 | 0.2907 |
| rs1025205  |         |        | 453 | T:C | T | 0.4269 | 0.112 | 0.894, 0.882 | 1.083 | 0.298  |
| rs713971   | CACNA1I | intron | 637 | T:C | T | 0.5894 | 0.089 | 0.916, 0.905 | 1.051 | 0.3052 |
| rs4679417  |         |        | 23  | A:G | A | 1      | 0.038 | 0.966, 0.959 | 1.049 | 0.3057 |
| rs6736648  | ZNF142  | intron | 342 | A:G | A | 0.6371 | 0.038 | 0.966, 0.959 | 1.003 | 0.3167 |
| rs17137871 |         |        | 509 | T:C | T | 0.7254 | 0.083 | 0.922, 0.912 | 0.967 | 0.3253 |
| rs1373978  | DNAH5   | intron | 636 | A:C | A | 0.7092 | 0.03  | 0.973, 0.967 | 0.939 | 0.3326 |
| rs6433660  |         |        | 625 | C:T | C | 0.3261 | 0.011 | 0.991, 0.987 | 0.933 | 0.3341 |
| rs9330317  |         |        | 487 | G:C | G | 0.9034 | 0.085 | 0.920, 0.910 | 0.917 | 0.3382 |
| rs1946643  | CTNNA2  | intron | 508 | G:A | G | 0.6285 | 0.112 | 0.893, 0.882 | 0.916 | 0.3385 |
| rs10913190 | PAPPA2  | intron | 207 | T:C | T | 0.9662 | 0.063 | 0.941, 0.933 | 0.884 | 0.3471 |
| rs17162072 |         |        | 588 | G:A | G | 0.6158 | 0.267 | 0.741, 0.726 | 0.859 | 0.3539 |
| rs772378   |         |        | 307 | T:C | T | 0.8767 | 0.049 | 0.955, 0.947 | 0.829 | 0.3626 |
| rs2448144  |         |        | 501 | C:T | T | 0.648  | 0.075 | 0.080, 0.071 | 0.793 | 0.3731 |
| rs16834361 |         |        | 620 | C:T | C | 0.3404 | 0.04  | 0.964, 0.957 | 0.75  | 0.3865 |
| rs603446   | ZNF259  | intron | 272 | C:T | C | 0.9143 | 0.419 | 0.589, 0.573 | 0.721 | 0.3957 |
| rs11039351 |         |        | 512 | C:T | C | 0.1786 | 0.053 | 0.951, 0.944 | 0.713 | 0.3984 |
| rs12654448 | SLIT3   | intron | 423 | C:T | C | 0.3938 | 0.068 | 0.936, 0.928 | 0.676 | 0.4108 |
| rs2399681  |         |        | 564 | G:A | G | 0.6549 | 0.353 | 0.654, 0.639 | 0.67  | 0.4129 |
| rs11668272 | NLRP4   | intron | 246 | G:A | G | 0.5226 | 0.162 | 0.844, 0.832 | 0.665 | 0.4146 |
| rs7913781  |         |        | 401 | A:G | G | 0.6446 | 0.064 | 0.068, 0.060 | 0.659 | 0.4168 |
| rs11078697 | SENP3   | intron | 505 | C:T | C | 1      | 0.015 | 0.987, 0.983 | 0.653 | 0.4192 |
| rs1863939  | KIAA947 | intron | 181 | G:A | G | 0.1059 | 0.044 | 0.959, 0.953 | 0.632 | 0.4265 |
| rs1913453  |         |        | 500 | A:G | A | 0.8859 | 0.175 | 0.831, 0.820 | 0.626 | 0.429  |
| rs13421576 |         |        | 94  | C:T | T | 1      | 0.035 | 0.038, 0.032 | 0.6   | 0.4385 |
| rs1907382  | MKX     | intron | 476 | G:A | G | 0.4081 | 0.084 | 0.920, 0.912 | 0.554 | 0.4566 |

|            |              |                                |     |     |   |          |       |              |       |        |
|------------|--------------|--------------------------------|-----|-----|---|----------|-------|--------------|-------|--------|
| rs988856   | SPOCK1       | intron                         | 445 | G:A | G | 0.0325   | 0.158 | 0.847, 0.837 | 0.503 | 0.4781 |
| rs2270603  | DKFZP434B335 | intron                         | 119 | C:T | C | 0.7496   | 0.152 | 0.853, 0.844 | 0.471 | 0.4923 |
| rs6744483  |              |                                | 490 | T:C | T | 0.6116   | 0.101 | 0.903, 0.895 | 0.47  | 0.4932 |
| rs2305912  | UNC13D,UNK   | locus-region,mrna-utr          | 607 | T:C | T | 1        | 0.021 | 0.981, 0.978 | 0.442 | 0.506  |
| rs9309974  |              |                                | 362 | G:C | C | 0.1376   | 0.026 | 0.028, 0.024 | 0.433 | 0.5106 |
| rs2274598  |              |                                | 43  | A:G | G | 0.9924   | 0.022 | 0.024, 0.020 | 0.422 | 0.5161 |
| rs190038   |              |                                | 262 | T:A | T | 0.743    | 0.018 | 0.983, 0.980 | 0.377 | 0.5393 |
| rs11065386 | HNF1A        | intron                         | 638 | T:C | C | 0.6195   | 0.028 | 0.030, 0.026 | 0.37  | 0.543  |
| rs16825392 |              |                                | 366 | T:C | C | 1        | 0.027 | 0.029, 0.025 | 0.35  | 0.5542 |
| rs6834153  | CPZ          | intron                         | 303 | G:A | A | 1        | 0.016 | 0.018, 0.015 | 0.345 | 0.557  |
| rs548902   |              |                                | 426 | T:C | T | 0.5972   | 0.427 | 0.578, 0.568 | 0.331 | 0.5652 |
| rs10850886 | KSR2         | intron                         | 456 | A:C | A | 0.547    | 0.098 | 0.905, 0.899 | 0.315 | 0.5745 |
| rs10450466 |              |                                | 372 | T:C | T | 1        | 0.019 | 0.983, 0.980 | 0.311 | 0.577  |
| rs1456566  |              |                                | 350 | A:G | G | 0.6214   | 0.119 | 0.122, 0.115 | 0.306 | 0.5803 |
| rs17065005 | LMO7         | intron                         | 276 | C:T | T | 1        | 0.12  | 0.124, 0.117 | 0.302 | 0.5823 |
| rs920113   |              |                                | 93  | C:T | C | 0.1915   | 0.054 | 0.949, 0.944 | 0.293 | 0.5883 |
| rs4787041  | A2BP1        | intron                         | 179 | T:C | T | 1        | 0.02  | 0.982, 0.979 | 0.288 | 0.5912 |
| rs12626719 |              |                                | 56  | T:C | T | 4.00E-04 | 0.031 | 0.971, 0.968 | 0.281 | 0.5961 |
| rs2306936  | RHOC         | intron                         | 335 | C:T | C | 0.6584   | 0.058 | 0.944, 0.940 | 0.28  | 0.5965 |
| rs287539   |              |                                | 363 | A:T | T | 0.4951   | 0.043 | 0.045, 0.041 | 0.259 | 0.6108 |
| rs17215946 |              |                                | 353 | T:C | T | 1        | 0.01  | 0.991, 0.990 | 0.241 | 0.6233 |
| rs2693443  |              |                                | 118 | T:C | C | 1        | 0.056 | 0.058, 0.054 | 0.226 | 0.6344 |
| rs36359    |              |                                | 254 | A:G | A | 0.9256   | 0.103 | 0.899, 0.894 | 0.214 | 0.6438 |
| rs16969103 |              |                                | 274 | A:G | A | 0.2225   | 0.043 | 0.959, 0.955 | 0.21  | 0.6465 |
| rs5762201  |              |                                | 161 | G:A | G | 0.1536   | 0.052 | 0.950, 0.946 | 0.203 | 0.6523 |
| rs4426986  |              |                                | 560 | G:A | G | 0.4582   | 0.078 | 0.924, 0.920 | 0.183 | 0.6685 |
| rs7842019  |              |                                | 53  | A:G | A | 0.2609   | 0.156 | 0.847, 0.841 | 0.177 | 0.6739 |
| rs1544935  |              |                                | 78  | A:C | A | 0.2959   | 0.232 | 0.772, 0.765 | 0.16  | 0.6892 |
| rs16971748 |              |                                | 213 | G:A | G | 0.0193   | 0.052 | 0.950, 0.947 | 0.149 | 0.6998 |
| rs11179614 |              |                                | 553 | G:A | G | 0.3039   | 0.093 | 0.909, 0.905 | 0.14  | 0.7086 |
| rs2116714  |              |                                | 598 | G:A | A | 1        | 0.006 | 0.007, 0.006 | 0.1   | 0.7512 |
| rs11081279 | ARHGAP28     | intron                         | 615 | A:G | A | 0.5933   | 0.05  | 0.951, 0.948 | 0.09  | 0.7644 |
| rs769242   | CCNA2        | coding-nonsynonymous,reference | 642 | G:A | G | 1        | 0.039 | 0.962, 0.960 | 0.085 | 0.7704 |



|            |         |        |     |     |   |        |       |              |       |        |
|------------|---------|--------|-----|-----|---|--------|-------|--------------|-------|--------|
| rs7749012  |         |        | 54  | A:G | G | 0.4137 | 0.033 | 0.034, 0.032 | 0.082 | 0.774  |
| rs7474778  |         |        | 11  | C:T | T | 0.5918 | 0.293 | 0.295, 0.290 | 0.082 | 0.7744 |
| rs17712680 |         |        | 105 | T:G | G | 0.6899 | 0.056 | 0.057, 0.055 | 0.061 | 0.8042 |
| rs17037744 |         |        | 280 | C:T | T | 0.2526 | 0.146 | 0.148, 0.145 | 0.053 | 0.8186 |
| rs6733394  |         |        | 529 | T:G | G | 0.6173 | 0.052 | 0.053, 0.051 | 0.049 | 0.8249 |
| rs17235154 |         |        | 215 | T:C | T | 0.7908 | 0.054 | 0.947, 0.945 | 0.047 | 0.8285 |
| rs10509685 | PDLIM1  | intron | 478 | G:A | G | 0.7047 | 0.074 | 0.927, 0.925 | 0.039 | 0.8427 |
| rs17148851 | SMR3A   | intron | 290 | C:T | T | 0.2811 | 0.058 | 0.059, 0.057 | 0.035 | 0.8514 |
| rs12230077 |         |        | 364 | A:G | A | 1      | 0.03  | 0.971, 0.970 | 0.031 | 0.86   |
| rs2334111  | CTSO    | intron | 394 | C:T | T | 1      | 0.021 | 0.022, 0.021 | 0.03  | 0.8628 |
| rs2427016  | CDH4    | intron | 622 | C:T | T | 1      | 0.117 | 0.118, 0.116 | 0.027 | 0.8691 |
| rs1861536  |         |        | 61  | C:T | T | 0.2473 | 0.06  | 0.061, 0.059 | 0.019 | 0.8893 |
| rs9394723  |         |        | 634 | G:A | G | 1      | 0.084 | 0.917, 0.916 | 0.019 | 0.8911 |
| rs7024708  |         |        | 573 | A:G | A | 0.7839 | 0.088 | 0.913, 0.912 | 0.008 | 0.93   |
| rs16953782 |         |        | 195 | A:G | G | 1      | 0.035 | 0.035, 0.035 | 0.002 | 0.9622 |
| rs10485043 |         |        | 269 | G:A | A | 1      | 0.002 | 0.002, 0.002 | 0.001 | 0.9695 |
| rs6494420  | HERC1   | intron | 438 | A:G | G | 0.0667 | 0.061 | 0.062, 0.061 | 0.001 | 0.9724 |
| rs10750596 | FLJ3281 | intron | 591 | A:T | A | 0.0935 | 0.237 | 0.763, 0.763 | 0.001 | 0.9763 |
| rs12638278 |         |        | 216 | C:T | T | 0.936  | 0.023 | 0.023, 0.023 | 0     | 0.9887 |
| rs1340668  | TINAG   | intron | 466 | C:T | C | 1      | 0.017 | 0.983, 0.983 | 0     | 0.9891 |
| rs7780223  |         |        | 383 | C:A | C | 1      | 0.078 | 0.922, 0.922 | 0     | 0.9892 |
| rs2805860  | DAB1    | intron | 28  | G:C | C | 0.9237 | 0.021 | 0.021, 0.021 | 0     | 0.9908 |
| rs7840631  | FUT1    | intron | 574 | T:T | T | 1      | T:T   | N/A          | 0     | 1      |
| rs7627457  |         |        | 224 | G:A | G | 1      | G:A   | N/A          | 0     | 1      |

<sup>†</sup>Chi-square p-values after individual-genotyping of all European samples combined.

**Supplementary Table 3: Individual-genotyping of Finnish samples of the 177 top-ranked SNPs**

| SNP        | Gene     | Location | Pooled  |         | Associated |        | HWpval | MAF              | Case,Control<br>Frequencies | Chi<br>square <sup>1</sup> | P value |
|------------|----------|----------|---------|---------|------------|--------|--------|------------------|-----------------------------|----------------------------|---------|
|            |          |          | Ranking | Alleles | Allele     |        |        |                  |                             |                            |         |
| rs2839580  | PDE9A    | intron   | 124     | T:G     | G          | 0.8025 | 0.405  | 177:179, 112:246 | 25.176                      | 5.23E-07                   |         |
| rs10802205 | KIF26B   | intron   | 92      | T:C     | T          | 0.3878 | 0.487  | 210:144, 155:203 | 18.297                      | 1.89E-05                   |         |
| rs7308245  |          |          | 15      | G:A     | A          | 0.4795 | 0.329  | 144:212, 91:267  | 18.263                      | 1.92E-05                   |         |
| rs17415514 | PLCE1    | intron   | 76      | T:C     | T          | 0.3293 | 0.236  | 288:58, 244:106  | 17.665                      | 2.63E-05                   |         |
| rs1884869  |          |          | 126     | T:C     | T          | 0.7583 | 0.434  | 228:128, 175:181 | 16.061                      | 6.13E-05                   |         |
| rs3849811  |          |          | 1       | A:G     | A          | 0.3987 | 0.214  | 300:54, 258:98   | 15.893                      | 6.70E-05                   |         |
| rs11166358 |          |          | 58      | T:C     | T          | 0.7796 | 0.337  | 261:95, 211:145  | 15.713                      | 7.37E-05                   |         |
| rs8057489  | CDH13    | intron   | 146     | C:A     | A          | 0.2587 | 0.379  | 158:194, 109:243 | 14.487                      | 1.00E-04                   |         |
| rs10936200 | LOC34881 | intron   | 77      | C:G     | C          | 0.4707 | 0.282  | 277:77, 234:124  | 14.586                      | 1.00E-04                   |         |
| rs6086737  |          |          | 2       | G:C     | C          | 0.7081 | 0.482  | 193:157, 147:209 | 13.561                      | 2.00E-04                   |         |
| rs2022601  | SLC25A21 | intron   | 38      | G:A     | A          | 0.6349 | 0.37   | 156:200, 107:247 | 14.066                      | 2.00E-04                   |         |
| rs4246794  |          |          | 137     | C:T     | T          | 0.3607 | 0.363  | 152:202, 105:249 | 13.493                      | 2.00E-04                   |         |
| rs4692949  | PALLD    | intron   | 200     | T:C     | C          | 0.5352 | 0.409  | 165:179, 121:235 | 14.143                      | 2.00E-04                   |         |
| rs13043535 |          |          | 131     | T:C     | T          | 0.8393 | 0.413  | 233:123, 185:171 | 13.349                      | 3.00E-04                   |         |
| rs796459   |          |          | 59      | C:T     | C          | 0.0346 | 0.387  | 236:112, 183:153 | 12.841                      | 3.00E-04                   |         |
| rs10458144 |          |          | 41      | C:T     | C          | 0.2137 | 0.496  | 203:153, 157:201 | 12.381                      | 4.00E-04                   |         |
| rs4982640  |          |          | 112     | A:T     | A          | 0.2835 | 0.404  | 234:120, 188:166 | 12.413                      | 4.00E-04                   |         |
| rs17154077 | COG5     | intron   | 27      | T:C     | C          | 0.9154 | 0.31   | 132:224, 89:269  | 12.469                      | 4.00E-04                   |         |
| rs2520241  | COG5     | intron   | 33      | T:C     | C          | 0.9154 | 0.31   | 132:224, 89:269  | 12.469                      | 4.00E-04                   |         |
| rs798601   |          |          | 51      | T:A     | T          | 0.069  | 0.374  | 242:108, 201:157 | 12.766                      | 4.00E-04                   |         |
| rs1077729  |          |          | 13      | G:A     | G          | 0.3903 | 0.451  | 219:137, 173:185 | 12.548                      | 4.00E-04                   |         |
| rs179736   | STRN3    | intron   | 83      | C:T     | C          | 0.9449 | 0.461  | 215:141, 168:186 | 11.955                      | 5.00E-04                   |         |
| rs12626774 | PDE9A    | intron   | 12      | G:C     | G          | 0.2218 | 0.407  | 234:122, 188:168 | 12.311                      | 5.00E-04                   |         |
| rs1559096  |          |          | 180     | T:C     | T          | 0.0013 | 0.07   | 341:13, 321:37   | 12.102                      | 5.00E-04                   |         |
| rs11249611 |          |          | 139     | T:C     | T          | 1      | 0.33   | 255:93, 217:139  | 12.091                      | 5.00E-04                   |         |
| rs1884655  |          |          | 82      | A:G     | G          | 0.3157 | 0.249  | 108:246, 69:287  | 11.742                      | 6.00E-04                   |         |
| rs2487928  | KIAA1462 | intron   | 165     | G:A     | G          | 0.6025 | 0.465  | 210:140, 168:188 | 11.641                      | 6.00E-04                   |         |
| rs2250435  |          |          | 87      | T:A     | A          | 1      | 0.189  | 85:271, 50:308   | 11.433                      | 7.00E-04                   |         |
| rs10888197 |          |          | 32      | A:G     | A          | 1      | 0.441  | 217:131, 178:180 | 11.432                      | 7.00E-04                   |         |
| rs4835748  | C5orf5   | intron   | 23      | C:T     | T          | 0.3337 | 0.484  | 195:161, 148:204 | 11.484                      | 7.00E-04                   |         |
| rs7484197  | SPON1    | intron   | 31      | A:G     | A          | 0.1495 | 0.338  | 257:99, 216:142  | 11.221                      | 8.00E-04                   |         |

|            |          |                                |     |     |   |        |       |                  |        |          |
|------------|----------|--------------------------------|-----|-----|---|--------|-------|------------------|--------|----------|
| rs12421865 | IGSF22   | intron                         | 28  | A:G | A | 1      | 0.224 | 295:61, 259:99   | 11.359 | 8.00E-04 |
| rs4810949  |          |                                | 57  | G:T | G | 0.0916 | 0.275 | 275:77, 238:118  | 11.267 | 8.00E-04 |
| rs10872897 | SLC25A21 | intron                         | 105 | A:T | T | 0.3562 | 0.382 | 156:196, 115:243 | 11.185 | 8.00E-04 |
| rs7213894  | DNAH2    | coding-nonsynonymous,reference | 173 | T:C | T | 0.9273 | 0.4   | 234:120, 193:165 | 11.02  | 9.00E-04 |
| rs198838   |          |                                | 24  | G:A | G | 1      | 0.466 | 211:143, 168:188 | 10.991 | 9.00E-04 |
| rs17078346 |          |                                | 7   | A:C | A | 0.3402 | 0.092 | 336:20, 312:46   | 11.126 | 9.00E-04 |
| rs3734279  | EYA4     | mrna-utr                       | 42  | C:T | T | 0.9056 | 0.38  | 156:198, 113:241 | 11.085 | 9.00E-04 |
| rs9532534  |          |                                | 159 | C:T | C | 0.3252 | 0.224 | 293:61, 258:98   | 10.828 | 0.001    |
| rs283730   |          |                                | 4   | T:G | T | 0.3383 | 0.401 | 235:121, 193:165 | 10.885 | 0.001    |
| rs7728933  |          |                                | 14  | G:C | C | 0.3366 | 0.483 | 193:161, 151:207 | 10.856 | 0.001    |
| rs198837   |          |                                | 78  | T:A | T | 1      | 0.465 | 210:142, 170:188 | 10.573 | 0.0011   |
| rs13421717 |          |                                | 43  | C:T | T | 0.286  | 0.239 | 103:251, 66:286  | 10.376 | 0.0013   |
| rs16916451 |          |                                | 99  | T:C | T | 0.4554 | 0.063 | 344:12, 325:33   | 10.334 | 0.0013   |
| rs17095742 |          |                                | 36  | C:A | C | 1      | 0.279 | 273:79, 239:119  | 10.289 | 0.0013   |
| rs234184   |          |                                | 61  | A:G | A | 1      | 0.277 | 275:79, 238:118  | 10.384 | 0.0013   |
| rs11192913 |          |                                | 17  | C:T | C | 0.6965 | 0.49  | 203:153, 161:197 | 10.372 | 0.0013   |
| rs4838350  |          |                                | 63  | G:A | G | 0.7725 | 0.323 | 257:93, 221:135  | 10.398 | 0.0013   |
| rs4450130  | ARHGAP22 | intron                         | 34  | G:A | G | 0.9853 | 0.274 | 276:78, 241:117  | 10.147 | 0.0014   |
| rs10957671 |          |                                | 114 | T:G | G | 0.7205 | 0.471 | 186:164, 142:204 | 10.228 | 0.0014   |
| rs741714   |          |                                | 10  | A:G | A | 0.1841 | 0.399 | 227:117, 185:157 | 10.115 | 0.0015   |
| rs1365203  | RBM35A   | intron                         | 69  | G:C | C | 0.2129 | 0.397 | 162:194, 120:234 | 9.988  | 0.0016   |
| rs11677234 | CCDC128  | intron                         | 18  | C:G | C | 0.4596 | 0.312 | 263:91, 227:131  | 9.83   | 0.0017   |
| rs1416079  |          |                                | 20  | T:C | T | 0.3613 | 0.136 | 322:34, 295:63   | 9.846  | 0.0017   |
| rs9503199  |          |                                | 35  | G:A | G | 0.1558 | 0.439 | 218:134, 178:176 | 9.725  | 0.0018   |
| rs11139616 |          |                                | 170 | T:A | A | 0.5599 | 0.419 | 169:185, 128:226 | 9.75   | 0.0018   |
| rs10444538 | KRT8     | intron                         | 19  | C:T | C | 0.0711 | 0.062 | 342:12, 326:32   | 9.452  | 0.0021   |
| rs3743566  | NDRG4    | mrna-utr                       | 119 | C:T | C | 0.1782 | 0.251 | 283:71, 249:107  | 9.448  | 0.0021   |
| rs2677744  | MAN2A2   | intron                         | 162 | G:A | G | 0.3488 | 0.396 | 235:121, 195:161 | 9.395  | 0.0022   |
| rs2178824  |          |                                | 83  | C:T | C | 0.9037 | 0.276 | 276:80, 241:117  | 9.313  | 0.0023   |
| rs1770319  |          |                                | 140 | C:G | C | 0.0568 | 0.404 | 232:124, 192:164 | 9.329  | 0.0023   |
| rs11249609 |          |                                | 153 | G:A | G | 0.8853 | 0.276 | 276:80, 241:117  | 9.313  | 0.0023   |
| rs10831750 | MICAL2   | intron                         | 179 | C:T | T | 0.8744 | 0.438 | 176:180, 136:220 | 9.128  | 0.0025   |
| rs4982641  |          |                                | 6   | C:T | T | 0.0454 | 0.387 | 145:181, 109:221 | 9.058  | 0.0026   |

|            |           |              |     |     |   |        |       |                  |       |        |
|------------|-----------|--------------|-----|-----|---|--------|-------|------------------|-------|--------|
| rs12153575 |           |              | 145 | C:G | G | 0.3445 | 0.27  | 114:242, 79:279  | 8.969 | 0.0027 |
| rs7495407  |           |              | 149 | T:C | T | 0.1883 | 0.313 | 263:93, 226:130  | 8.939 | 0.0028 |
| rs1532414  |           |              | 72  | T:G | G | 0.5712 | 0.279 | 116:236, 81:273  | 8.902 | 0.0028 |
| rs8060064  |           |              | 118 | A:G | G | 0.6335 | 0.219 | 94:260, 62:296   | 8.873 | 0.0029 |
| rs4780599  | ABCC6     | intron       | 100 | T:C | T | 1      | 0.282 | 272:82, 238:118  | 8.741 | 0.0031 |
| rs17116135 | ATP1A     | intron       | 151 | T:C | T | 0.0688 | 0.074 | 338:16, 321:37   | 8.737 | 0.0031 |
| rs1466113  | SSTR2     | intron       | 141 | G:C | C | 0.4941 | 0.426 | 171:185, 132:224 | 8.739 | 0.0031 |
| rs6737516  |           |              | 120 | T:C | C | 0.6177 | 0.346 | 141:213, 105:253 | 8.68  | 0.0032 |
| rs4738374  |           |              | 107 | T:C | T | 0.9038 | 0.436 | 220:136, 178:172 | 8.59  | 0.0034 |
| rs11126997 |           |              | 176 | A:G | A | 0.3252 | 0.224 | 291:63, 260:96   | 8.588 | 0.0034 |
| rs1703086  |           |              | 117 | G:A | A | 1      | 0.293 | 122:234, 87:271  | 8.567 | 0.0034 |
| rs17411126 |           |              | 116 | T:C | T | 0.1364 | 0.265 | 279:77, 246:112  | 8.55  | 0.0035 |
| rs28571682 |           |              | 9   | C:T | C | 0.5669 | 0.134 | 318:34, 295:61   | 8.514 | 0.0035 |
| rs247651   |           |              | 16  | A:G | A | 0.7456 | 0.18  | 305:49, 277:79   | 8.373 | 0.0038 |
| rs1446535  |           |              | 62  | C:T | T | 1      | 0.292 | 120:232, 87:271  | 8.235 | 0.0041 |
| rs1790256  | INTS4     | intron       | 94  | A:G | A | 0.0235 | 0.364 | 230:104, 192:138 | 8.175 | 0.0042 |
| rs2066300  |           |              | 125 | A:G | A | 0.7454 | 0.422 | 221:129, 188:170 | 8.195 | 0.0042 |
| rs6019582  | ARFGEF2   | intron       | 133 | C:T | C | 0.9143 | 0.257 | 272:72, 245:107  | 8.163 | 0.0043 |
| rs4415156  |           |              | 129 | T:C | T | 0.0615 | 0.314 | 262:94, 228:130  | 8.139 | 0.0043 |
| rs6952440  |           |              | 88  | T:C | T | 0.1632 | 0.436 | 215:133, 183:175 | 8.16  | 0.0043 |
| rs2034507  | LOC1556   | mrna-utr     | 70  | A:G | A | 0.1172 | 0.417 | 224:128, 189:167 | 8.1   | 0.0044 |
| rs8077799  |           |              | 53  | C:T | C | 0.8917 | 0.17  | 308:46, 283:75   | 7.986 | 0.0047 |
| rs10484691 | KHDRBS2   | intron       | 177 | G:C | C | 0.7561 | 0.037 | 20:334, 6:350    | 7.907 | 0.0049 |
| rs906796   |           |              | 144 | A:C | C | 0.2717 | 0.314 | 129:227, 95:263  | 7.8   | 0.0052 |
| rs8013139  |           |              | 37  | A:G | G | 0.4993 | 0.255 | 107:249, 75:283  | 7.794 | 0.0052 |
| rs41268    | FLJ23834  | intron       | 8   | A:G | A | 0.1168 | 0.112 | 326:28, 306:52   | 7.811 | 0.0052 |
| rs7693366  |           |              | 29  | T:C | C | 0.1826 | 0.442 | 175:179, 139:217 | 7.768 | 0.0053 |
| rs11122129 |           |              | 135 | C:G | G | 0.7887 | 0.159 | 70:286, 43:313   | 7.668 | 0.0056 |
| rs17722963 |           |              | 128 | A:G | G | 0.1443 | 0.18  | 78:276, 50:306   | 7.666 | 0.0056 |
| rs29776    | LOC153222 | locus-region | 106 | G:C | G | 0.9045 | 0.396 | 233:123, 198:160 | 7.674 | 0.0056 |
| rs10798263 | FMO2      | intron       | 179 | T:C | T | 0.2152 | 0.277 | 274:82, 241:115  | 7.642 | 0.0057 |
| rs779701   | GRM7      | intron       | 152 | T:C | T | 0.575  | 0.323 | 257:97, 224:132  | 7.608 | 0.0058 |
| rs11604865 |           |              | 3   | T:C | C | 1      | 0.183 | 79:275, 51:305   | 7.577 | 0.0059 |

|            |                 |                     |     |     |   |        |       |                  |       |        |
|------------|-----------------|---------------------|-----|-----|---|--------|-------|------------------|-------|--------|
| rs9953621  | ARHGAP28        | intron              | 143 | G:C | C | 0.9407 | 0.355 | 144:212, 109:247 | 7.511 | 0.0061 |
| rs2631988  | ALK             | intron              | 45  | C:G | G | 0.7616 | 0.317 | 130:226, 96:260  | 7.494 | 0.0062 |
| rs6134907  | TASPI           | intron              | 122 | T:G | G | 1      | 0.224 | 94:258, 65:293   | 7.462 | 0.0063 |
| rs9959465  |                 |                     | 148 | C:T | C | 0.1611 | 0.362 | 242:110, 211:147 | 7.398 | 0.0065 |
| rs1634997  | KIAA1324L       | intron              | 108 | G:A | A | 0.17   | 0.424 | 169:187, 134:224 | 7.368 | 0.0066 |
| rs779706   | GRM7            | intron              | 86  | C:G | C | 0.7026 | 0.332 | 252:100, 222:136 | 7.34  | 0.0067 |
| rs17241282 | PLA2R1          | intron              | 64  | T:C | C | 0.38   | 0.439 | 174:182, 138:216 | 7.053 | 0.0079 |
| rs2538485  | FLJ21986        | intron              | 93  | T:C | C | 0.4687 | 0.197 | 84:272, 56:300   | 6.971 | 0.0083 |
| rs4755436  | LDLRAD3         | intron              | 29  | G:A | G | 0.9986 | 0.41  | 225:127, 194:164 | 6.948 | 0.0084 |
| rs10849147 |                 |                     | 147 | A:C | C | 0.4561 | 0.181 | 78:278, 51:305   | 6.902 | 0.0086 |
| rs7700917  | JMJD1B          | intron              | 109 | T:C | C | 0.4967 | 0.359 | 143:209, 111:245 | 6.864 | 0.0088 |
| rs9863323  | PTPRG           | intron              | 172 | C:A | C | 0.1843 | 0.202 | 298:58, 270:86   | 6.825 | 0.009  |
| rs11646019 | CDH13           | intron              | 5   | C:T | T | 0.8777 | 0.426 | 168:186, 132:218 | 6.832 | 0.009  |
| rs10515793 |                 |                     | 115 | C:T | C | 0.5172 | 0.457 | 206:142, 176:180 | 6.75  | 0.0094 |
| rs761625   | LOC729658,PACRG | intron,locus-region | 45  | G:A | G | 0.366  | 0.309 | 252:90, 229:125  | 6.593 | 0.0102 |
| rs737811   | ZNF74           | intron              | 22  | G:A | G | 0.3445 | 0.27  | 275:81, 246:112  | 6.588 | 0.0103 |
| rs12138736 |                 |                     | 104 | T:C | C | 0.885  | 0.461 | 181:175, 146:208 | 6.584 | 0.0103 |
| rs6743983  |                 |                     | 74  | A:C | C | 0.7701 | 0.447 | 176:180, 143:215 | 6.51  | 0.0107 |
| rs6728476  | RAMP1           | intron              | 161 | A:G | G | 0.6596 | 0.334 | 135:221, 103:253 | 6.463 | 0.011  |
| rs16880300 |                 |                     | 11  | A:G | A | 1      | 0.083 | 334:20, 319:39   | 6.441 | 0.0112 |
| rs13259448 |                 |                     | 184 | T:C | T | 0.9055 | 0.194 | 297:55, 272:82   | 6.414 | 0.0113 |
| rs2222630  | CD8             | intron              | 103 | A:G | A | 0.7204 | 0.118 | 325:31, 305:53   | 6.391 | 0.0115 |
| rs12122453 |                 |                     | 178 | C:G | C | 0.4725 | 0.284 | 270:86, 241:117  | 6.374 | 0.0116 |
| rs10255860 |                 |                     | 54  | C:T | C | 0.2655 | 0.411 | 225:129, 191:161 | 6.304 | 0.012  |
| rs13135254 | FREM3           | intron              | 136 | T:C | T | 0.2446 | 0.354 | 246:110, 214:142 | 6.29  | 0.0121 |
| rs1029089  |                 |                     | 55  | G:A | G | 0.2509 | 0.434 | 218:138, 186:172 | 6.258 | 0.0124 |
| rs6474512  | PLEKHA2         | intron              | 95  | C:A | A | 0.2261 | 0.349 | 140:216, 109:249 | 6.196 | 0.0128 |
| rs696518   | STAG1           | intron              | 101 | A:C | C | 0.5841 | 0.437 | 172:184, 140:218 | 6.152 | 0.0131 |
| rs11808528 |                 |                     | 121 | G:A | A | 0.8143 | 0.417 | 163:189, 133:225 | 6.121 | 0.0134 |
| rs696081   | PCCB            | intron              | 26  | C:T | C | 0.3667 | 0.47  | 205:151, 164:176 | 6.102 | 0.0135 |
| rs8065138  |                 |                     | 127 | T:C | C | 0.617  | 0.349 | 137:211, 108:246 | 6.062 | 0.0138 |
| rs1468322  |                 |                     | 151 | A:G | A | 0.3036 | 0.139 | 318:38, 297:61   | 6.055 | 0.0139 |
| rs11055394 |                 |                     | 79  | T:C | T | 0.3777 | 0.192 | 299:55, 275:81   | 5.968 | 0.0146 |

|            |           |                             |     |     |   |        |       |                  |       |        |
|------------|-----------|-----------------------------|-----|-----|---|--------|-------|------------------|-------|--------|
| rs3829881  | PTGFRN    | mrna-utr                    | 59  | G:A | A | 0.58   | 0.475 | 184:170, 154:204 | 5.731 | 0.0167 |
| rs9600161  | KLF12     | intron                      | 181 | C:G | C | 0.9347 | 0.071 | 339:17, 319:33   | 5.705 | 0.0169 |
| rs12191885 |           |                             | 44  | T:C | T | 1      | 0.33  | 252:102, 221:131 | 5.636 | 0.0176 |
| rs2248028  | KRT32     | locus-region                | 50  | A:G | G | 0.9472 | 0.24  | 98:254, 72:284   | 5.627 | 0.0177 |
| rs6584410  | PDZD7     | intron                      | 157 | C:T | C | 1      | 0.434 | 216:138, 186:170 | 5.558 | 0.0184 |
| rs2949385  | GRID1     | intron                      | 138 | T:G | G | 0.8928 | 0.346 | 136:214, 107:245 | 5.549 | 0.0185 |
| rs12623398 |           |                             | 111 | A:T | A | 0.9013 | 0.434 | 217:139, 186:170 | 5.495 | 0.0191 |
| rs12534029 | SEMA3C    | intron                      | 48  | G:C | G | 0.2258 | 0.148 | 311:41, 289:63   | 5.461 | 0.0195 |
| rs7581601  |           |                             | 66  | A:C | A | 0.7421 | 0.331 | 253:103, 225:133 | 5.448 | 0.0196 |
| rs10516714 |           |                             | 110 | A:G | G | 0.6798 | 0.305 | 123:233, 95:263  | 5.405 | 0.0201 |
| rs169705   | RAB3C     | intron                      | 133 | G:A | A | 0.7903 | 0.273 | 111:245, 84:274  | 5.353 | 0.0207 |
| rs6720704  |           |                             | 84  | C:G | C | 0.5477 | 0.273 | 268:82, 245:111  | 5.338 | 0.0209 |
| rs4681202  | LOC7325   | intron                      | 91  | A:C | C | 0.8733 | 0.233 | 94:254, 70:286   | 5.318 | 0.0211 |
| rs7295752  |           |                             | 156 | G:A | G | 0.8118 | 0.307 | 261:95, 234:124  | 5.307 | 0.0212 |
| rs4699423  | UNC5C     | coding-synonymous,reference | 174 | A:G | A | 0.592  | 0.483 | 199:157, 169:187 | 5.062 | 0.0245 |
| rs16891378 | HIST1H4D  | locus-region                | 90  | A:G | A | 0.037  | 0.185 | 300:54, 280:78   | 5.031 | 0.0249 |
| rs10468501 |           |                             | 130 | C:T | T | 0.0422 | 0.387 | 149:199, 118:224 | 5.025 | 0.025  |
| rs11059307 |           |                             | 166 | A:G | A | 0.2955 | 0.453 | 206:144, 177:173 | 4.849 | 0.0277 |
| rs188384   | CCDC5     | intron                      | 75  | G:C | G | 0.4141 | 0.445 | 212:144, 184:174 | 4.804 | 0.0284 |
| rs1835742  |           |                             | 168 | A:G | A | 0.5791 | 0.274 | 270:84, 247:111  | 4.739 | 0.0295 |
| rs9404214  |           |                             | 155 | A:G | A | 0.067  | 0.329 | 247:101, 224:130 | 4.713 | 0.0299 |
| rs1780542  |           |                             | 134 | T:C | T | 1      | 0.148 | 303:41, 288:62   | 4.611 | 0.0318 |
| rs2144817  | CLMN      | intron                      | 150 | T:C | C | 0.8581 | 0.424 | 165:191, 136:218 | 4.571 | 0.0325 |
| rs2360761  |           |                             | 145 | G:T | G | 0.705  | 0.276 | 269:85, 245:111  | 4.564 | 0.0327 |
| rs12106721 |           |                             | 68  | C:T | C | 0.6991 | 0.301 | 262:94, 236:120  | 4.516 | 0.0336 |
| rs6546923  |           |                             | 167 | T:C | T | 0.7166 | 0.28  | 269:87, 245:113  | 4.495 | 0.034  |
| rs1979803  | EEA1      | intron                      | 60  | A:C | A | 0.2522 | 0.393 | 226:124, 201:153 | 4.477 | 0.0343 |
| rs1465404  |           |                             | 44  | C:T | T | 1      | 0.235 | 95:259, 72:284   | 4.313 | 0.0378 |
| rs717081   |           |                             | 81  | T:C | T | 0.2926 | 0.426 | 217:137, 192:166 | 4.281 | 0.0385 |
| rs11586990 |           |                             | 97  | A:G | A | 0.4215 | 0.258 | 276:80, 254:104  | 4.038 | 0.0445 |
| rs2950694  | LOC644264 | intron                      | 51  | T:C | T | 0.2241 | 0.076 | 334:20, 320:34   | 3.929 | 0.0475 |
| rs13118200 | ANK2      | intron                      | 169 | T:A | T | 0.7245 | 0.463 | 202:150, 178:178 | 3.884 | 0.0488 |
| rs7069220  | ARHGAP22  | intron                      | 33  | G:A | G | 0.2829 | 0.171 | 305:51, 287:71   | 3.82  | 0.0506 |

|            |           |        |     |     |   |        |       |                  |       |        |
|------------|-----------|--------|-----|-----|---|--------|-------|------------------|-------|--------|
| rs6093929  |           |        | 132 | A:G | G | 0.2324 | 0.494 | 189:167, 164:194 | 3.784 | 0.0517 |
| rs1713421  | NP        | intron | 113 | A:C | A | 0.4349 | 0.172 | 301:51, 285:71   | 3.693 | 0.0546 |
| rs16897536 | VPS13B    | intron | 46  | A:C | A | 1      | 0.128 | 319:37, 302:54   | 3.641 | 0.0564 |
| rs13212664 | LOC728275 | intron | 71  | T:A | T | 0.5066 | 0.268 | 270:84, 241:103  | 3.434 | 0.0639 |
| rs4346412  |           |        | 65  | T:C | T | 0.0402 | 0.35  | 243:113, 221:137 | 3.342 | 0.0676 |
| rs1921093  |           |        | 164 | C:T | C | 0.6527 | 0.424 | 216:138, 192:162 | 3.332 | 0.068  |
| rs11241200 |           |        | 182 | T:G | T | 0.8886 | 0.49  | 193:163, 169:185 | 2.976 | 0.0845 |
| rs4852939  |           |        | 171 | G:C | G | 0.0676 | 0.314 | 255:101, 235:123 | 2.971 | 0.0847 |
| rs895565   |           |        | 102 | T:C | T | 0.3823 | 0.157 | 305:47, 277:61   | 2.879 | 0.0897 |
| rs7734050  |           |        | 96  | T:G | T | 0.5554 | 0.241 | 278:76, 261:95   | 2.642 | 0.1041 |
| rs1411944  |           |        | 67  | T:C | T | 0.684  | 0.309 | 256:100, 236:120 | 2.631 | 0.1048 |
| rs9498995  |           |        | 49  | A:G | A | 0.9572 | 0.467 | 196:154, 179:175 | 2.088 | 0.1484 |
| rs564370   | SORBS1    | intron | 52  | A:T | A | 1      | 0.398 | 218:138, 208:144 | 0.34  | 0.5599 |
| rs960945   | NEDD9     | intron | 98  | T:C | T | 0.3252 | 0.186 | 290:66, 291:67   | 0.004 | 0.9519 |

<sup>1</sup>Chi-square p-values after individual-genotyping of all Finnish samples combined.

**Supplementary Table 4: GRM7 SNPs Individual-level Genotyping Results**

| GROUP                | CHR | SNP        | Position  | MAF<br>Cases | MAF<br>Controls | CHISQ | P-value  | OR    | CMH<br>P-value | N <sub>Cases</sub> | N <sub>Controls</sub> | N <sub>total</sub> |
|----------------------|-----|------------|-----------|--------------|-----------------|-------|----------|-------|----------------|--------------------|-----------------------|--------------------|
| Euro 1               | 3   | rs11928865 | 7,130,702 | 0.23         | 0.29            | 13.34 | 0.00026  | 1.361 |                | 748                | 751                   | 1499               |
| Fin                  | 3   | rs11928865 | 7,130,702 | 0.37         | 0.36            | 0.06  | 0.80550  | 0.962 |                | 180                | 180                   | 360                |
| Euro 2               | 3   | rs11928865 | 7,130,702 | 0.21         | 0.41            | 11.29 | 0.00078  | 2.556 |                | 63                 | 67                    | 130                |
| Euro 2 + Fin         | 3   | rs11928865 | 7,130,702 | 0.33         | 0.37            | 2.16  | 0.1416   | 1.222 | 0.1383         | 243                | 247                   | 490                |
| Euro 1 + Euro 2+ Fin | 3   | rs11928865 | 7,130,702 | 0.25         | 0.31            | 15.33 | 9.01E-05 | 1.323 | 1.02E-4        | 991                | 998                   | 1989               |
| Euro 1 + Fin         | 3   | rs779701   | 7,493,772 | 0.30         | 0.31            | 0.17  | 0.68100  | 1.030 | 0.6761         | 928                | 931                   | 1859               |
| Euro 1               | 3   | rs779701   | 7,493,772 | 0.31         | 0.30            | 0.85  | 0.35620  | 0.928 |                | 748                | 751                   | 1499               |
| Fin                  | 3   | rs779701   | 7,493,772 | 0.27         | 0.37            | 7.59  | 0.00587  | 1.560 |                | 180                | 180                   | 360                |
| Euro 1 + Fin         | 3   | rs779706   | 7,499,042 | 0.31         | 0.31            | 0.17  | 0.68360  | 1.030 | 0.6798         | 928                | 931                   | 1859               |
| Euro 1               | 3   | rs779706   | 7,499,042 | 0.31         | 0.30            | 0.82  | 0.36570  | 0.930 |                | 748                | 751                   | 1499               |
| Fin                  | 3   | rs779706   | 7,499,042 | 0.28         | 0.38            | 7.32  | 0.00680  | 1.542 |                | 180                | 180                   | 360                |

MAF: Minor Allele Frequency. CMH: Cochran-Mantel-Haenszel
